# Supplementary material for: Metal-free B-doped graphene with efficient electrocatalytic activity for hydrogen evolution reaction
Source: Royal Society of Chemistry journal article supplement (doi:10.1039/c4cy00075g), 2014-01-01
Supplement: c4cy00075g1.pdf [file c4cy00075g1.pdf]

*Supporting Information for*

**Metal-free B-Substituted Graphene with an Enhanced  
Electrocatalytic Activity for Hydrogen Evolution Reaction**

*Bhaskar Sathe,<sup>a,b</sup> Xiaoxin Zou,<sup>a,b</sup> and Tewodros Asefa<sup>a,b,c,\*</sup>*

<sup>a</sup> Department of Chemistry and Chemical Biology, Rutgers, The State University of New Jersey, 610 Taylor Road, Piscataway, New Jersey 08854, USA

<sup>b</sup> Department of Chemical and Biochemical Engineering, Rutgers, The State University of New Jersey, 98 Brett Road, Piscataway, New Jersey 08854, USA

<sup>c</sup> Institute for Advanced Materials, Devices and Nanotechnology, Rutgers, The State University of New Jersey, 607 Taylor Road, Piscataway New Jersey 08854, USA.

\* Corresponding Author: Tel.: (+1) 848-445-2970; Fax: (+1) 848-445-5312; E-mail: tasefa@rci.rutgers.edu

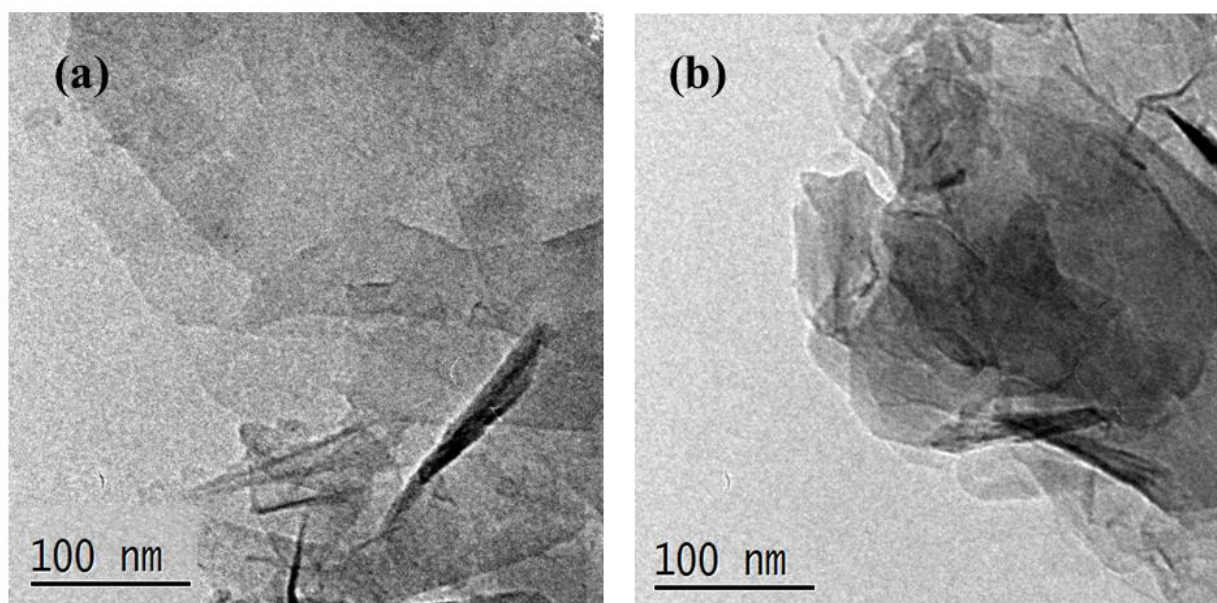

**Figure S1.** Typical low magnification TEM images of (a) DeG (the precursor material) and (b) B-SuG synthesized by doping DeG with B using  $\text{BH}_3\text{-THF}$  as a borylating agent.

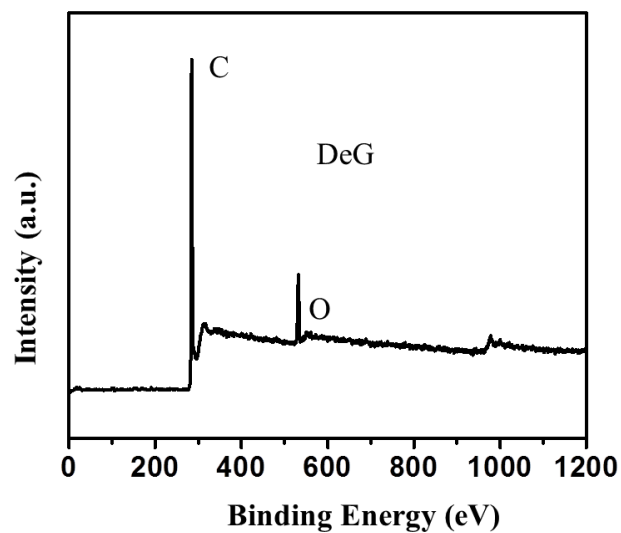

**Figure S2.** Full survey XPS spectrum of DeG. The compositions of C and O in the material in atomic percentage were found to be of 88.96 % and 5.45 %, respectively.

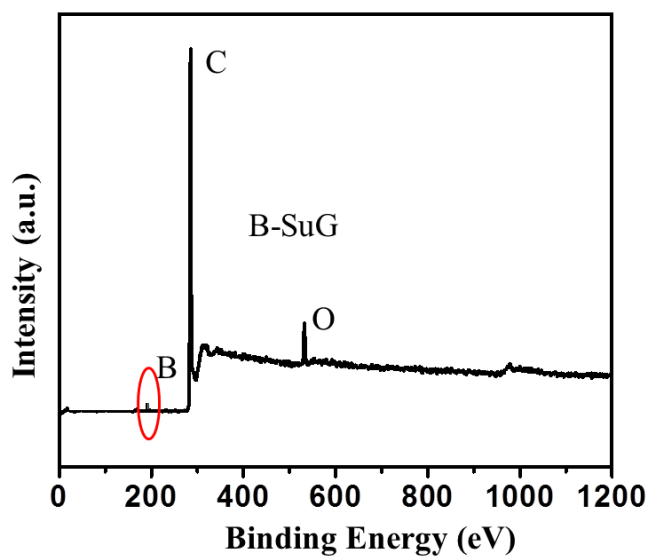

**Figure S3.** Full survey XPS spectrum of B-SuG. The compositions of C, O and B in the material in atomic percentages were found to be 88.96 %, 5.45 %, and 1.85 %, respectively.
